# Supplementary material for: Comparative genomics of emerging pathogens in the Candida glabrata clade
Source: PubMed Central journal article supplement (PMC3847288; doi:10.1186/1471-2164-14-623), 2013-09-14

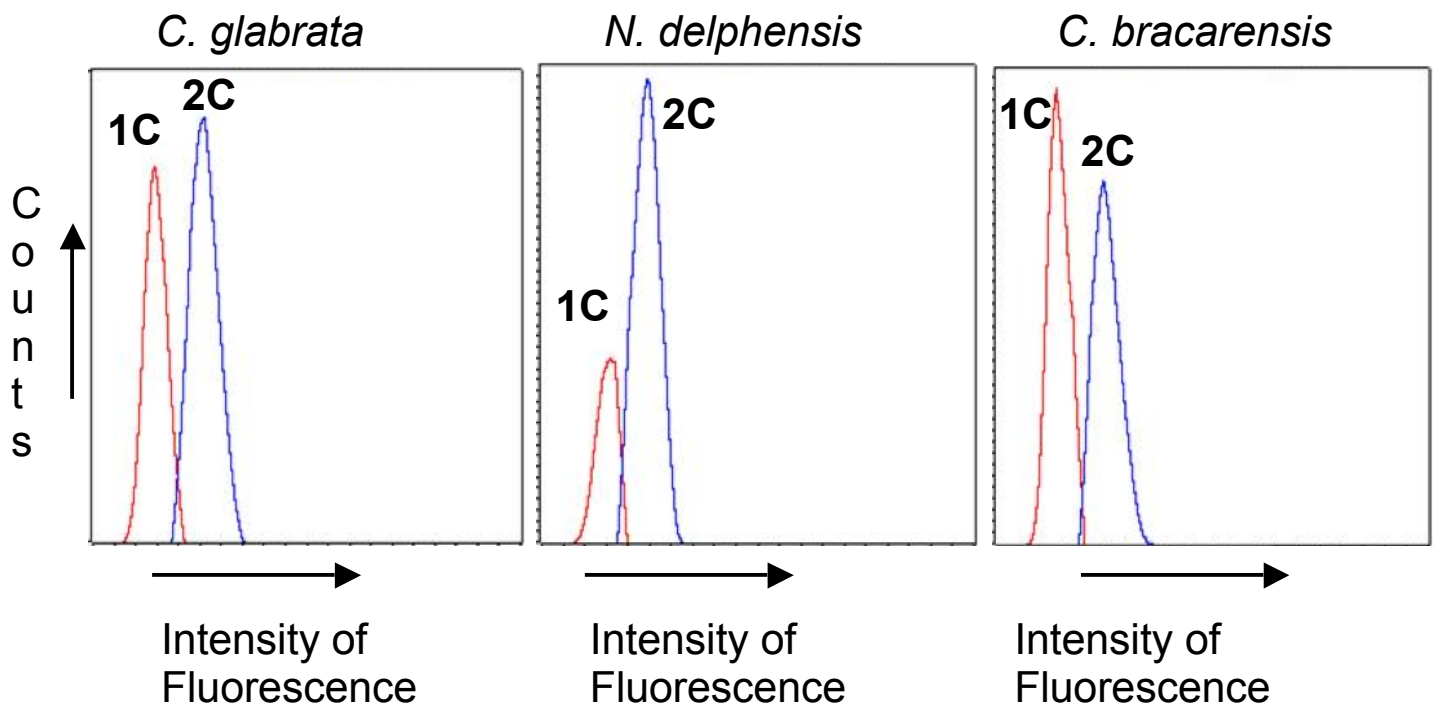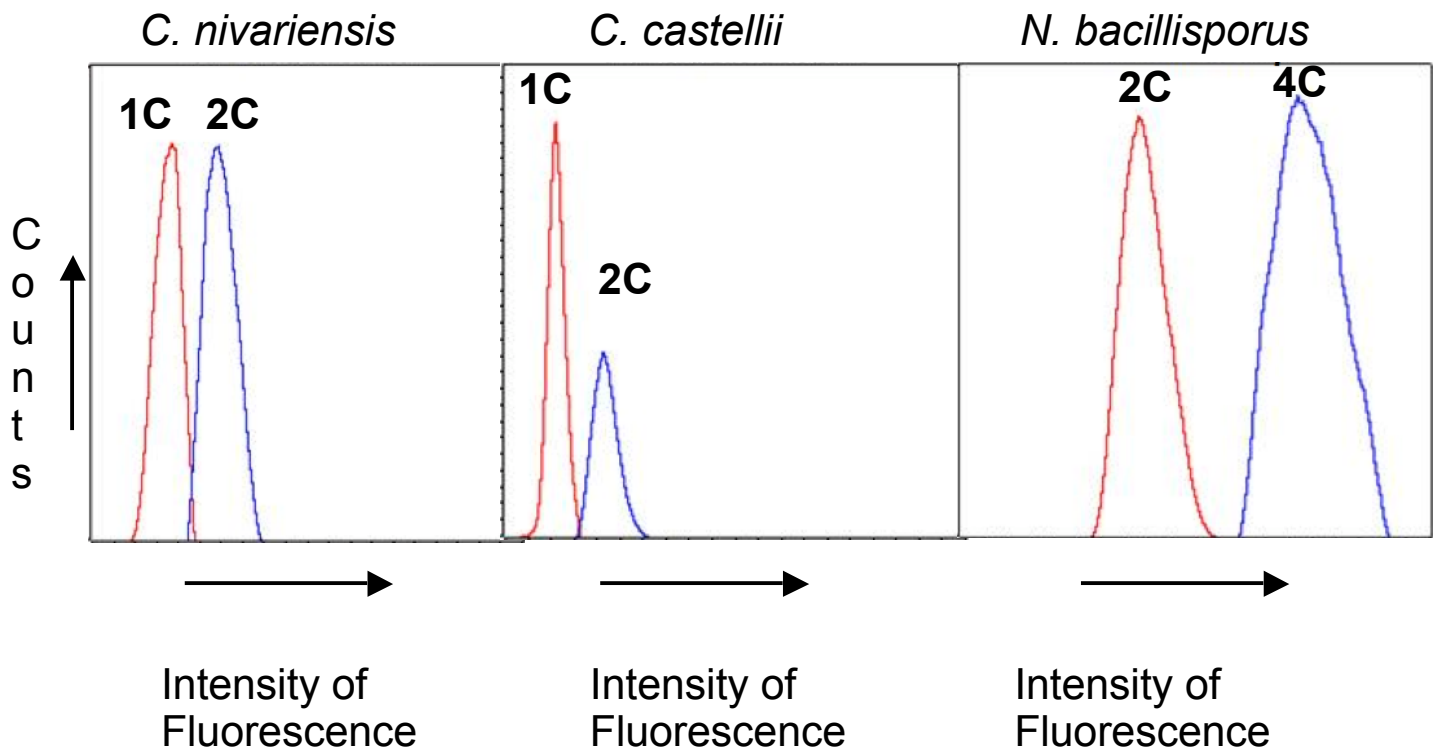

Supplement: 1471-2164-14-623-S2.pdf [file 1471-2164-14-623-S2.pdf]
