# Supplementary material for: Comparative genomics of emerging pathogens in the Candida glabrata clade
Source: PubMed Central journal article supplement (PMC3847288; doi:10.1186/1471-2164-14-623), 2013-09-14
Supplement: 1471-2164-14-623-S4.pdf [file 1471-2164-14-623-S4.pdf]

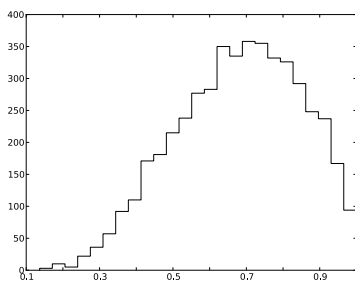

*C. glabrata - C. bracarensis*

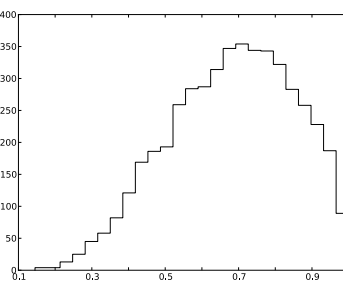

*C. glabrata - C. nivariensis*

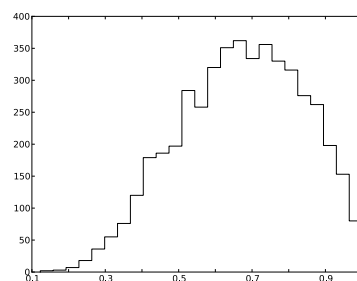

*C. glabrata - N. delphensis*

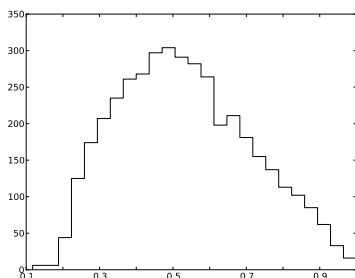

*C. glabrata - C. bacillisporus*

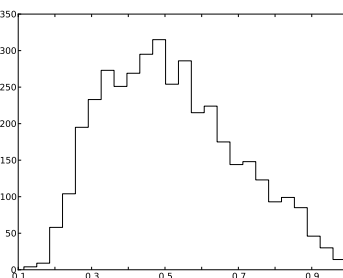

*C. glabrata - C. castellii*

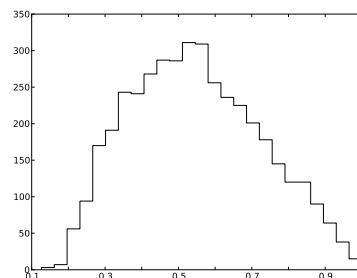

*C. glabrata - S. cerevisiae*

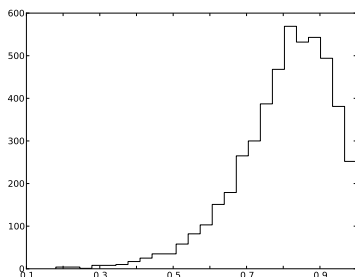

*N. delphensis - C. nivariensis*

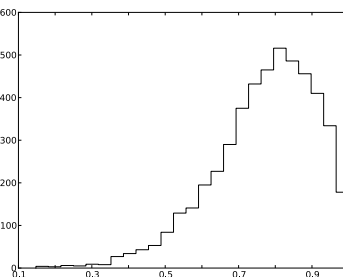

*N. delphensis - C. bracarensis*

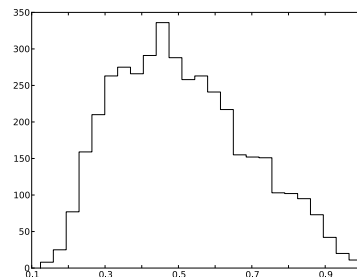

*N. delphensis - C. castellii*

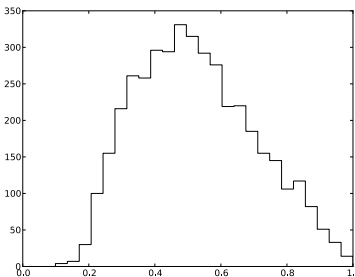

*N. delphensis - N. bacillisporus*

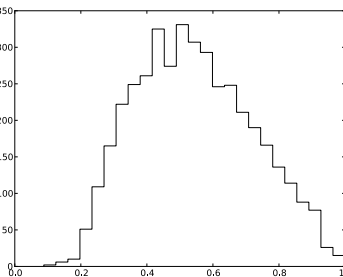

*N. delphensis - S. cerevisiae*

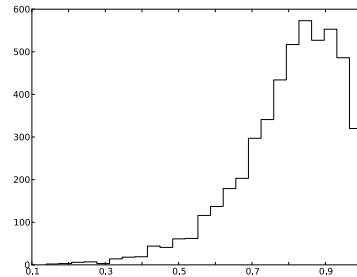

*C. nivariensis - C. bracarensis*

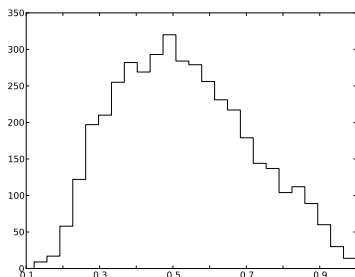

*C. nivariensis - N. bacillisporus*

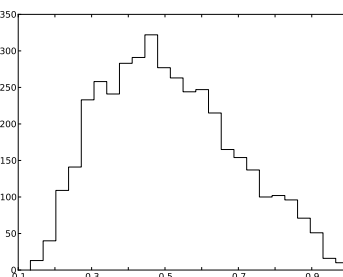

*C. nivariensis - C. castellii*

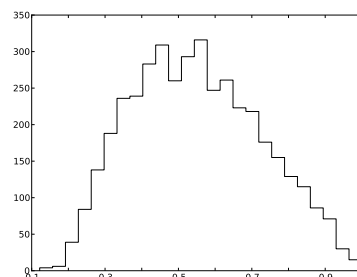

*C. nivariensis - S. cerevisiae*

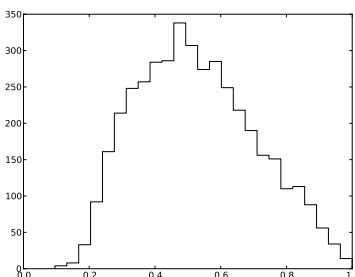

*C. bracarensis - N. bacillisporus*

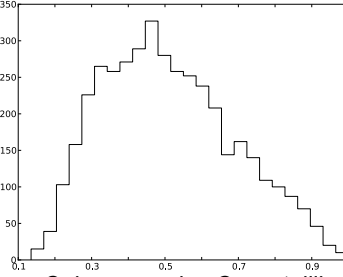

*C. bracarensis - C. castellii*

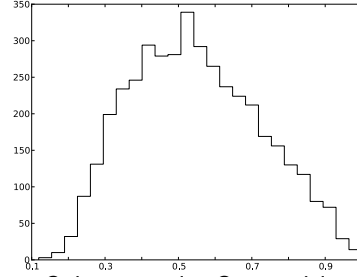

*C. bracarensis - S. cerevisiae*

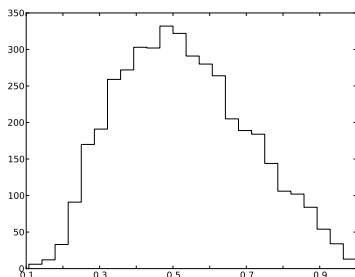

*N. bacillisporus - C. castellii*

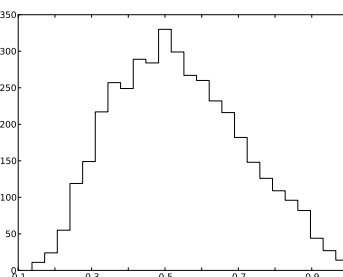

*N. bacillisporus - S. cerevisiae*

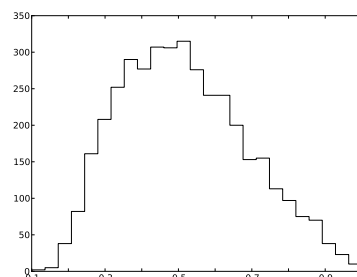

*C. castellii - S. cerevisiae*
