# Supplementary material for: Comparative genomics of emerging pathogens in the Candida glabrata clade
Source: PubMed Central journal article supplement (PMC3847288; doi:10.1186/1471-2164-14-623), 2013-09-14
Supplement: 1471-2164-14-623-S6.pdf [file 1471-2164-14-623-S6.pdf]

*N. delphensis* MFDINTTVMANGELIKKVCLELTVNSLVMCDDGTPARITHISSAHTTVEIYQOKTKHRANE  
*C. nivariensis* MFEINTTVMANGQIKKVSLELTVNSLIMCEDGTPARVTKLSKAHTTVEIYQOKTKHRANE  
*C. braccarensis* MFEKNTTVMISSGEVQKVSLELRVNSLIMCEDGTSARITGLSKARHTTVEIYQOKTKHRANE  
*C. glabrata* MFEKGTFTLMADGHLELTSATKSNYSVMCEDGTPGRVAYTTKAKOTIYEIVQOKTKHRANE  
*S. cerevisiae* MLESENTTILMANGELIKDANVTANSYVMCADGSAARVINVTQGYOKIYNIQOKTKHRAFE  
*C. castellii* MLEBEKTQVITSHKEIKDVSLLKVNDLNMCDDGTSARLIEIFEDVQPVYVEIYQOKTKHRANT  
*N. bacillisporus* MLEBENTQITITADHRLVEISDLKINDYILCDDGTSAQVVTQITRDAQVLYEIKHRTKHRANE

*N. delphensis* GEPGRLDPRRKTIVYQRLGFNCTGSHLILPLRVPATACLENSTIK-PNLTVRWRCLEEDVVTN  
*C. nivariensis* GEPGRLDPRRKTIVYQRLGFRCTGSHLILPLRAPAVFSLNSPKK-SNLTVRWRCLEQEIIT  
*C. braccarensis* GEPGRLDPRRKTIVYQRLGFNCTGSHVIVLRAPTIPLCLENSSKK-SNLTVRWRCLEBVLVTH  
*C. glabrata* GEPGRLDPRRRTVYNRLGNCSATHKLVLKTPSIPTLENNPRR-PNLTVRWRCLEBILIT  
*S. cerevisiae* GEPGRLDPRRRTVYQRLALQCTAGHKLSVRVPTKPLLEKSGRNATKYKVRWRNLQCCQTL  
*C. castellii* GEPGRLDPRRKTIVYQRLVLECGAAHKLRRTSATPQLVTSNKK-DNCTVCWKDMRQMVTV  
*N. bacillisporus* QLPGRLDPRRREVVYQRLTLNCTAGHKHLRLTIPACATIDNSPKK-SNLTVRWRCLEQEIETS

*N. delphensis* DGRRLISIPKNHHKNFPKTQEGFLADNFIKERSAITGDIYIDYLIIEVRDLDYLDTSMRVTS  
*C. nivariensis* DGRKSIIPKNHHKNFPKTEGYCQAQNFITEKRVINGDIYIDFKIEVRDLDYLDASMRVTS  
*C. braccarensis* DGRRLISIPKNHHKVFPKTELYIQAAQSFINEKRSINGDIYLYEIOVRDLDYLDASMRVTS  
*C. glabrata* DGRRLISIPKNHHKNFPKTKEGQLQAQNFMRDKRLIWGPDIDYEIOVRDLDYLDASMRVTS  
*S. cerevisiae* DGRRLISIPKNHHKTFPMTVEGEFAAKRFTEEMERSKGEYFNFDIEVRDLDYLDACLRISS  
*C. castellii* DGRRLDVPKTIHHKNFPKTSSEGIQAAYEMSGITSQMGSYLYYDMQVMDLEYLDPHVRVTS  
*N. bacillisporus* DQRKIIVPKTIHHKNFPKTNEGIIQAALFATDKIIELNAGFLEYDITQVIDLDYLDAYIRVSS

*N. delphensis* ALKCSPIILCGNGILSKFLSGKPHLITPSITAMAWLLGLWIGDGTKEPEITMDSLDAPLM  
*C. nivariensis* ALMCSPIILVGNGLSKFLSGQPHLITPSITVMAWLLGLWIGDGTKEPEITVDSHDVSLM  
*C. braccarensis* TMKCNPIILVGNGLSHHLSGQRHLITPAITAMAWLLGLWIGDGTKEPEITVDSQIDILM  
*C. glabrata* TLKCNPIILVGNGLSNFLSGQRHLITPAIVSMAWLLGLWIGDGTKEPEITVDSVDEKLM  
*S. cerevisiae* CIRFGPVLITGNGLSKFLTGRSDLVTPAVKSMAWLLGLWIGDGTKEPEITVDSLDPKLM  
*C. castellii* YMEFHPVTKGNGLISKHLITGQKGLITPKVLGMAWLLGLWIGDGTKEPEITMDSDELIT  
*N. bacillisporus* NMKFCPIIMGNGILANFLTGQKEIMTPSVICMAWMLGLWIGDGTKEPEITVDSLDVELM

*N. delphensis* NSLIVLGRKVGIIYPTYKDEKVLRAKHVRLYYGNEPEEKRKTRNLKNNPFWNTVLALGF  
*C. nivariensis* NSLIVLGRKVGIIYPTYKDEKVLRAKHVRLYYGNEPNEKRKTRNLKNNPFWNTVLALGF  
*C. braccarensis* NSLIVLGRKVGIIYPTYKDEKVLRAKHVRLYYGNEPEEKRKTRNLKNNPFWNTVLALGF  
*C. glabrata* ESLTVLGRKVGIIYPTYKDEKVLRAKHVRLYYGKGPPEERKTRNLKNNPFWNTIQNLGI  
*S. cerevisiae* ESLRENKIVGLYLTVCDHVPRAKHVRLYYGDPDENRKRTRNLKNNPFWKAVTILKF  
*C. castellii* AGLIEISSQWGIIPAFKDEHVPRAKHVRLYYGNGLDENRKRTRNLKNNPFWNTITSLKF  
*N. bacillisporus* RGLTELABEQWGIYPTYKDELVPLRAKHVRLYYGKPESENKRKTRNLKNNPFWNAVTILKF

*N. delphensis* KKENSGEKIVPEFMWTEDEIREAFLAGLIDSDGYVSKRKNPD-VYKVSITQTIYPCIMD  
*C. nivariensis* KKAISGEKIVPEFMWTEDEIREAFLAGLIDSDGYVVKRKNPD-TYKVSITQTVYPCIMD  
*C. braccarensis* KKEISGEKQVPEFMWTEDEIREAFLAGLIDSDGYVVKRKNPN-TYKVSITQTVYSIMD  
*C. glabrata* KREIDGKQVPEFMWTEDEIREAFLAGLIDSDGYVVKRKNPD-VYKVSITQTIYPSVMN  
*S. cerevisiae* KRDLGKQVPEFMYGEIIEVREAFAGLIDSDGYVVKKGEPE-SYKIAITQTVYSIMD  
*C. castellii* KRDLTGKQVPEFLWNEDEIREAFLAGLIDSDGYVVTNRNSSTPQKVSITQTVYSVMN  
*N. bacillisporus* KRDLGKQVPEFMWTEDEIREAFLAGLIDSDGYVLLNNGEN---YKVSITQTVYASVMN

*N. delphensis* AVVHIARSLGISATVTTTSARPEVI EGR LVNCOFTYDCNISGS SALQNVLSYCRSGHKRR  
*C. nivariensis* AVVHIARSLGISATVTTTSARPEVI EGR LVNCOFTYDCNISGS SALQNVLSYCRSGHKRR  
*C. braccarensis* AVVHIARSLGISATVTTTSARPEVI EGR LVNCOFTYDCNISGS SALQNVLSYCRSGHKRR  
*C. glabrata* AVVHIARSLGISATVTTTSARNEVI EGR LVNCOFTYDCNISGS TPLQNVLSYCRSGHKRR  
*S. cerevisiae* GIVHISRLGMSATVTTTSAREEVI EGR LVNCOFTYDCNIVAGGTTLQNVLSYCRSGHKRR  
*C. castellii* AVVHIARSLGISVTTTTSARSSEKI EDR TVQCRFTYDCNISGS GAPLQKVLSCHSKTKRR  
*N. bacillisporus* AVVHIARSLGISVTTTTSARTEKI EGR TVQCRFTYDCNISGS GLALQNVLSYCRSTFKRR

*N. delphensis* KAPESVIREPQFEGFIDKKISEADVKGIFEDERNILLGNKVVVAHCCKQECLETEGNRLLD  
*C. nivariensis* CPPESVIREPQFVGFIDQKSESEVIGIHLKQONILLGNKLI AHTCGPECLETEGNRQFD  
*C. braccarensis* DPPESVIRDPOFVGFIDQKISELEVVGIHLQTPKNILLANKIVARS CGKECLETEGNRHMD  
*C. glabrata* PAPPVTRDPQYVGFIDRKLREAEVYGIHLDQPRNILLGNKIVVYSCTECCETDAVHITK  
*S. cerevisiae* EPPITKREPVYFSFTDDFQGSTVYGLTEGHKNFLLGNKIEVKS CRGCCVGEQHKISQ  
*C. castellii* PDPGPFIRKPVYFGFDVKKHGPSKMGTKLDAKPIIMLANKMVS LPCTEACKVDHDIPYV  
*N. bacillisporus* PKPTNFDROPVYFGFDVERKGPASVIGFKTDSKKA VLLGNKVS LPI CNDQC TKDYDIPYV

*N. delphensis* TKKLYCVS CPRS GVRVYFYRDWTGKNRVCGRCYGRYKFSGYRCVNCMVVPEAREVKKAKM  
*C. nivariensis* TKNLYCVS CPRS GVRVYFYRDWSTGNRVCGRCYGRYKFSGYRCVNCMYVPEAREVKKAKM  
*C. braccarensis* IIRNLKYCVS CPRS GVRVYFYRDWTGKNRVCGRCYGRYKFSGYRCLNCKYVPEAREVKKAKM  
*C. glabrata* IKNLKHCVSCPRIGVRVYFYRDWTGKSHVCGRCYGRYKFSGYRCLNCKYVPEAREVKKAKM  
*S. cerevisiae* KKNLKHCVACPRKGIKYFYKDWGKGNRVCGRCYGRYKFSGHHCINCKYVPEAREVKKAKD  
*C. castellii* NPKTKQCIACPRRGVRVYFYKDWGESSVCGRCYAR YKFSGHRCLNCKYVPSREVKKAKM  
*N. bacillisporus* NKKLYCVS CPRS GVRVYFYKDWGTGRVCGRCYGRYKFSGHRCLNCKYVPEAREVKKAKS

*N. delphensis* KGBELGIDPTGIPVRGICCPRCGILNFDIEIRGFS SAHRRAMIN-----  
*C. nivariensis* KGBELGIDPSGIPVRGICCPRCGILLYDEVRGFS ANIRRVMLN-----  
*C. braccarensis* KGBELGIDSTGFPVRGCCCPRCGIMKYDEVRGPTITRAMLN-----  
*C. glabrata* RGETRLFEQSYITGLVCSRCCEGILTFDEIRGPAKKQAVQ-----  
*S. cerevisiae* KGEKLGITPEGLPVKGPCEIKCGGILQFDVAVRGP H KSCGNAGARIC-----  
*C. castellii* LGEKVGITPDGVMTOGYPCSSCGGILIFDAIRGPRKESRIALEAC-----  
*N. bacillisporus* QGTKIGFNEHGNVQGYPCVSCGGVLYVDEIRGPRKTAVAPSPPTS PPTS PPTS PPTS P

*N. delphensis* -----  
*C. nivariensis* -----  
*C. braccarensis* -----  
*C. glabrata* -----  
*S. cerevisiae* -----  
*C. castellii* -----  
*N. bacillisporus* SSSPSVSPSPSTPS PPSPPSPFRSFTPS PSFPPTSPSSPPPFSIESIPVTDSSVYI
