# Supplementary material for: Comparative genomics of emerging pathogens in the Candida glabrata clade
Source: PubMed Central journal article supplement (PMC3847288; doi:10.1186/1471-2164-14-623), 2013-09-14
Supplement: 1471-2164-14-623-S7.pdf [file 1471-2164-14-623-S7.pdf]

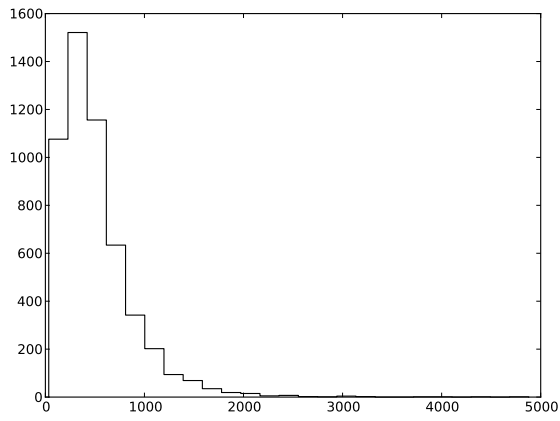

*Candida glabrata*

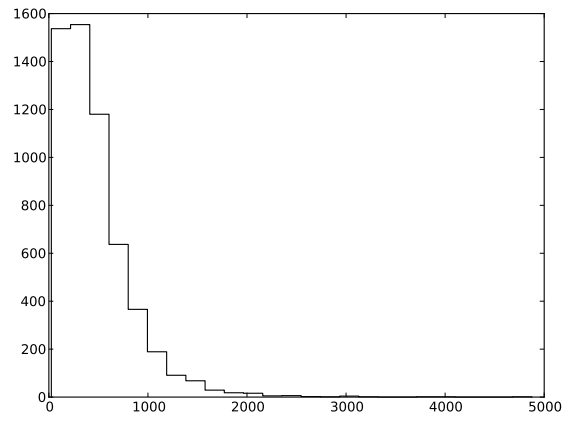

*Candida nivariensis*

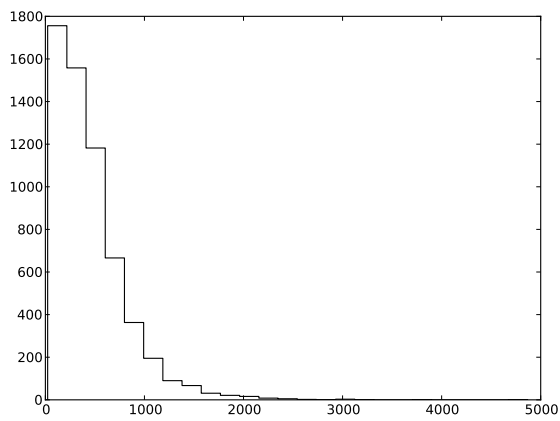

*Candida bracarensis*

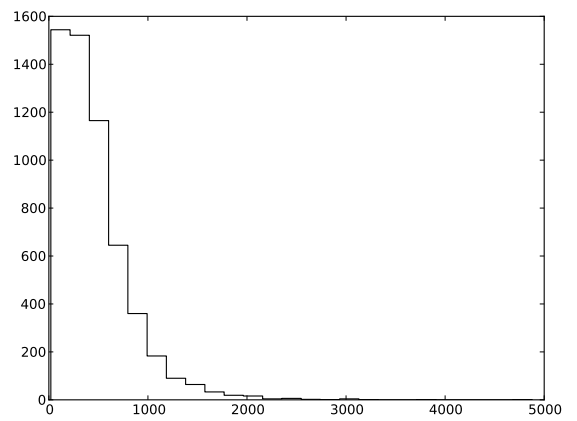

*Nakaseomyces delphensis*

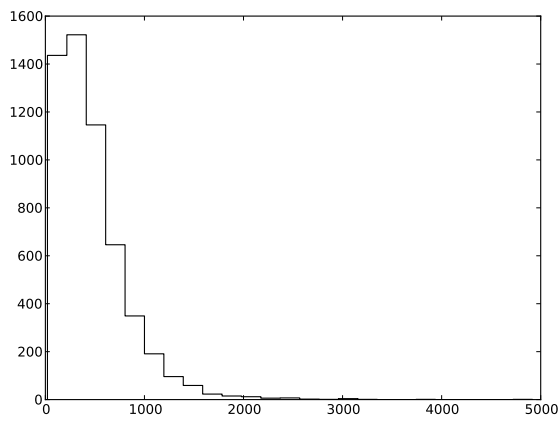

*Nakaseomyces bacillisporus*

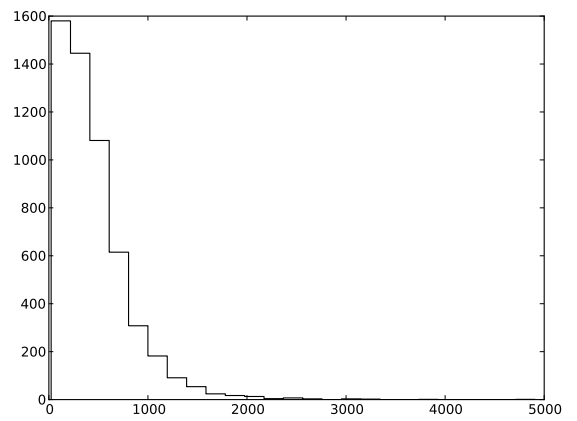

*Candida castellii*

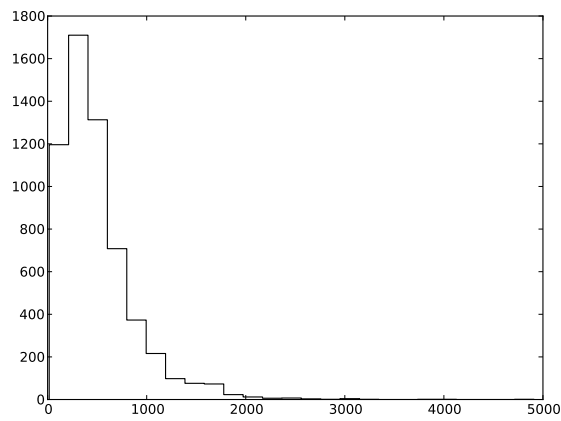

*Saccharomyces cerevisiae*
