# Supplementary material for: Comparative genomics of emerging pathogens in the Candida glabrata clade
Source: PubMed Central journal article supplement (PMC3847288; doi:10.1186/1471-2164-14-623), 2013-09-14
Supplement: 1471-2164-14-623-S10.pdf [file 1471-2164-14-623-S10.pdf]

*S. cerevisiae*

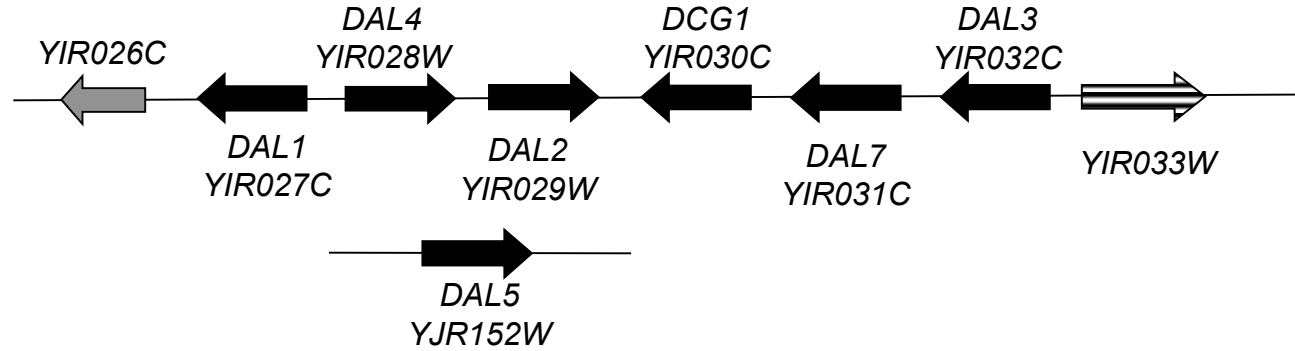

*N. bacillisporus*  
Scaffold 29  
931K-945K

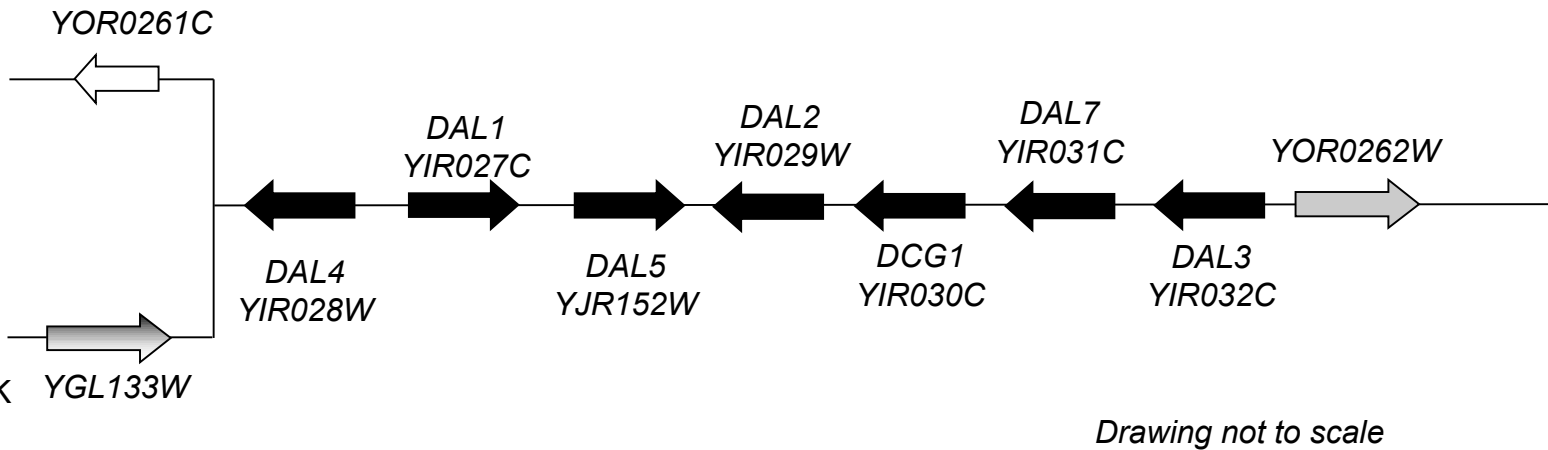

Drawing not to scale
