# Supplementary material for: Comparative genomics of emerging pathogens in the Candida glabrata clade
Source: PubMed Central journal article supplement (PMC3847288; doi:10.1186/1471-2164-14-623), 2013-09-14
Supplement: 1471-2164-14-623-S12.pdf [file 1471-2164-14-623-S12.pdf]

# LRT A

7 taxa

## Null model

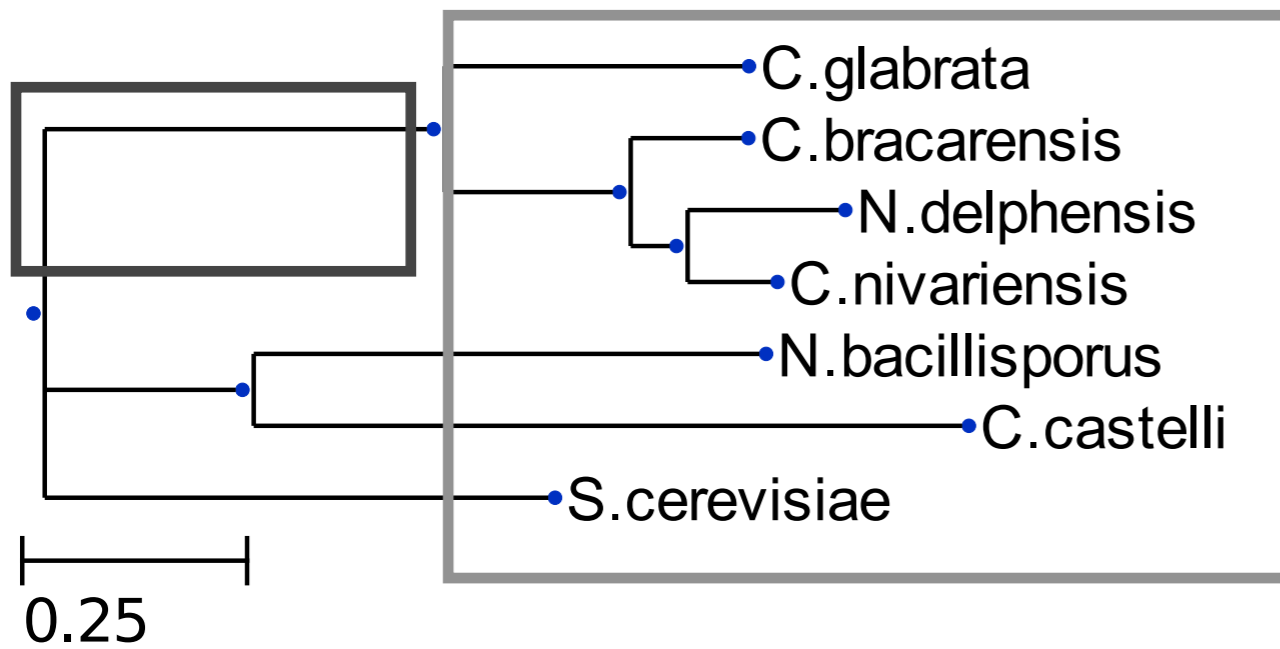

2-rates

## Alternative model

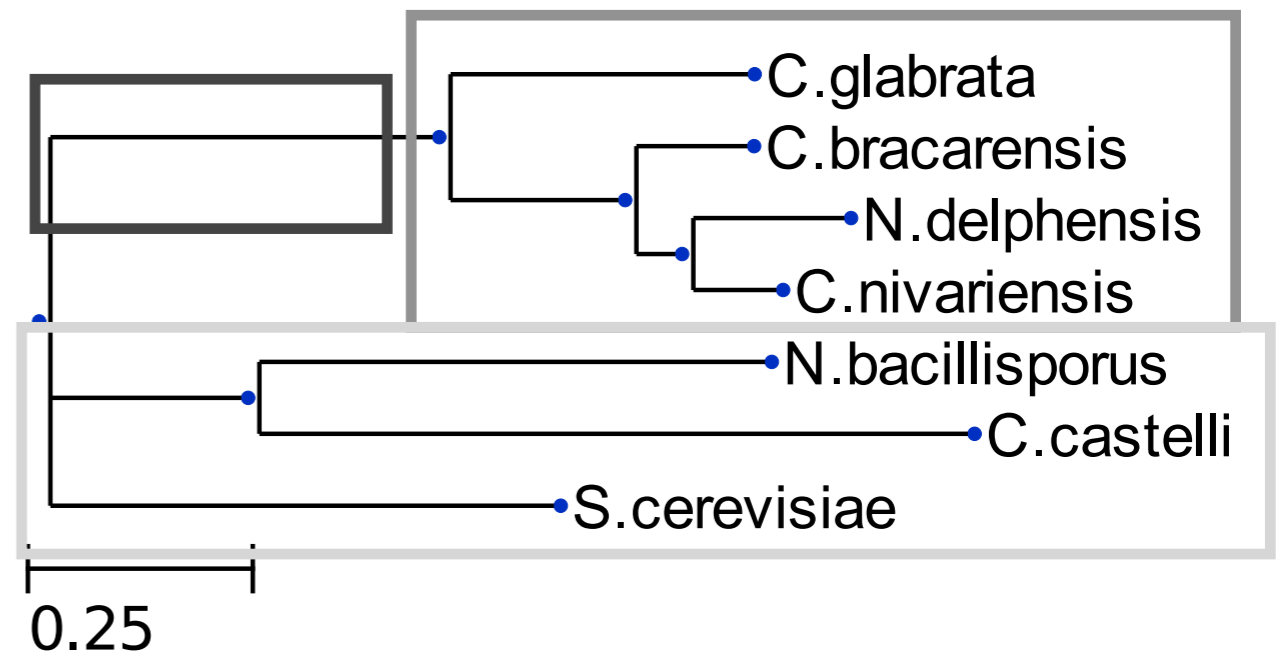

3-rates

# LRT B

5 taxa

## Null model

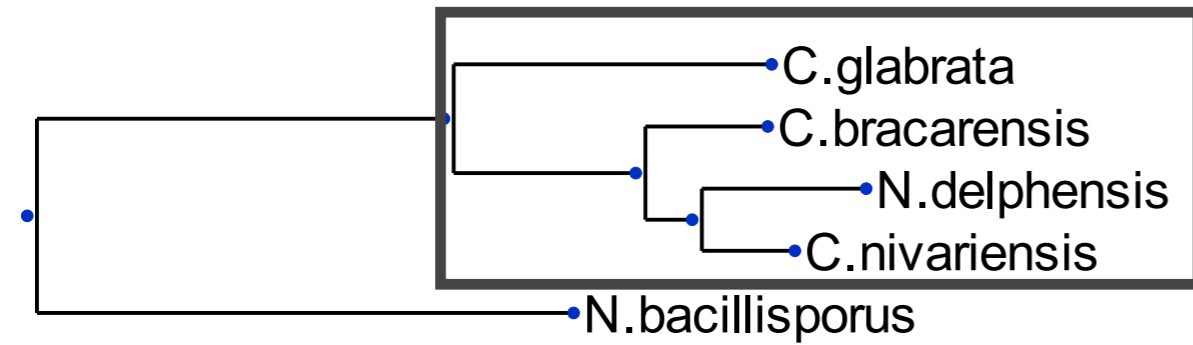

2-rates

## Alternative model

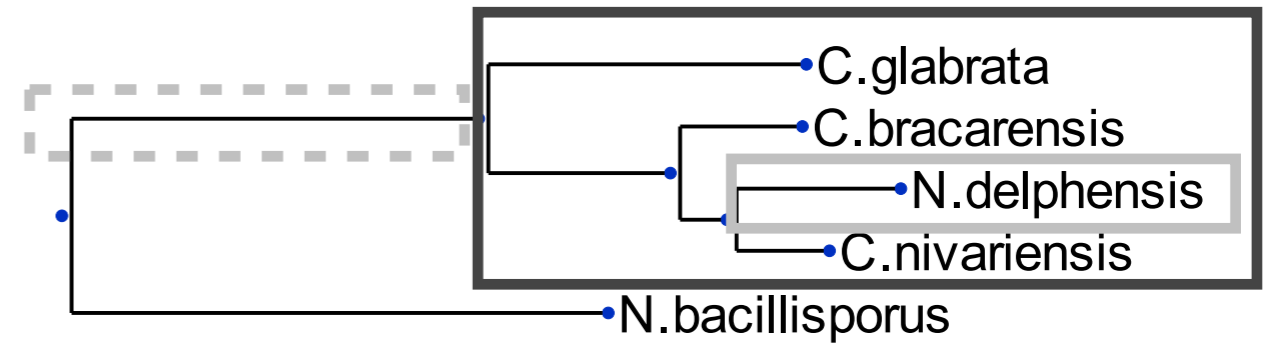

4-rates

# LRT C

5 taxa

## Null model

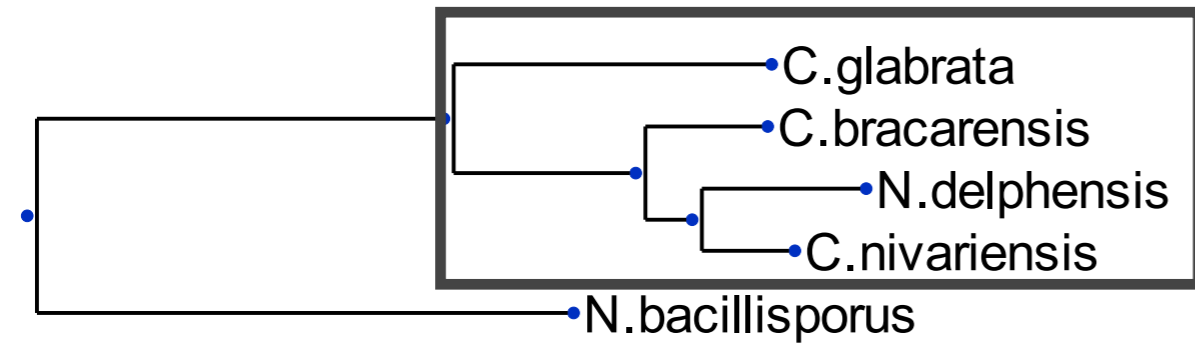

2-rates

## Alternative model

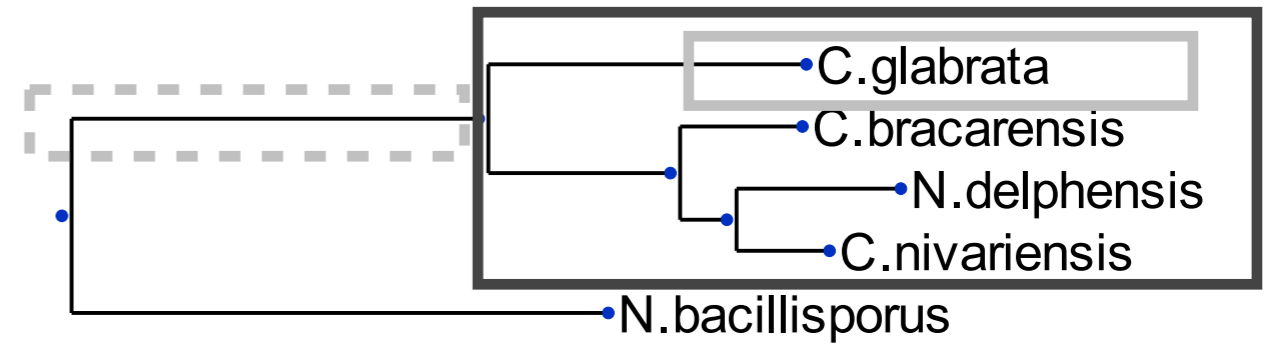

4-rates
